# Supplementary material
Source: PubMed Central journal article supplement (PMC8404722)
Supplement: sj-pdf-1-jcn-10.1177_08830738211001209.pdf [file sj-pdf-1-jcn-10.1177_08830738211001209.pdf]

## Supplemental Materials

**Supplemental Table 1.** Respondent country during COVID-19 survey II (May 2020,  $n = 391$ )

| <b>Country</b>            | <b><i>n</i> (%)</b> |
|---------------------------|---------------------|
| <b>United States</b>      | 285 (72.9%)         |
| <b>United Kingdom</b>     | 31 (7.9%)           |
| <b>Canada</b>             | 17 (4.4%)           |
| <b>Australia</b>          | 14 (3.6%)           |
| <b>Germany</b>            | 8 (2.1%)            |
| <b>France</b>             | 4 (1.0%)            |
| <b>Ireland</b>            | 4 (1.0%)            |
| <b>Netherlands</b>        | 3 (0.8%)            |
| <b>Spain</b>              | 3 (0.8%)            |
| <b>Israel</b>             | 2 (0.5%)            |
| <b>Sweden</b>             | 2 (0.5%)            |
| <b>Austria</b>            | 1 (0.3%)            |
| <b>Brazil</b>             | 1 (0.3%)            |
| <b>Bulgaria</b>           | 1 (0.3%)            |
| <b>Cyprus</b>             | 1 (0.3%)            |
| <b>Greece</b>             | 1 (0.3%)            |
| <b>India</b>              | 1 (0.3%)            |
| <b>Italy</b>              | 1 (0.3%)            |
| <b>Macao</b>              | 1 (0.3%)            |
| <b>Mexico</b>             | 1 (0.3%)            |
| <b>New Zealand</b>        | 1 (0.3%)            |
| <b>Norway</b>             | 1 (0.3%)            |
| <b>Poland</b>             | 1 (0.3%)            |
| <b>Portugal</b>           | 1 (0.3%)            |
| <b>Puerto Rico</b>        | 1 (0.3%)            |
| <b>Russian Federation</b> | 1 (0.3%)            |
| <b>South Africa</b>       | 1 (0.3%)            |
| <b>Suriname</b>           | 1 (0.3%)            |
| <b>Switzerland</b>        | 1 (0.3%)            |

**Supplemental Table 2.** Dependent's genetic status (*n* = 319)

| <b>Genetic Status</b>                | <b><i>n</i> (%)</b> |
|--------------------------------------|---------------------|
| <b>16p11.2 deletion</b>              | 71 (18.2%)          |
| <b>SCN2A</b>                         | 30 (7.7%)           |
| <b>16p11.2 duplication</b>           | 24 (6.1%)           |
| <b>GRIN2B</b>                        | 21 (5.4%)           |
| <b>ASXL3 (Bainbridge-Ropers)</b>     | 20 (5.1%)           |
| <b>PPP2R5D</b>                       | 20 (5.1%)           |
| <b>STXBP1</b>                        | 16 (4.1%)           |
| <b>1q21.1 deletion</b>               | 13 (3.3%)           |
| <b>SYNGAP1</b>                       | 13 (3.3%)           |
| <b>CSNK2A1 (Okur-Chung)</b>          | 12 (3.1%)           |
| <b>7q11.23 duplication</b>           | 9 (2.3%)            |
| <b>DYRK1A</b>                        | 9 (2.3%)            |
| <b>1q21.1 duplication</b>            | 8 (2.1%)            |
| <b>CHAMP1</b>                        | 8 (2.1%)            |
| <b>MED13L</b>                        | 8 (2.1%)            |
| <b>SETBP1 (Schinzel-Giedion)</b>     | 8 (2.1%)            |
| <b>SLC6A1</b>                        | 8 (2.1%)            |
| <b>CTNNB1</b>                        | 7 (1.8%)            |
| <b>HIVEP2</b>                        | 7 (1.8%)            |
| <b>PACS1 (Schuurs-Hoeijmakers)</b>   | 7 (1.8%)            |
| <b>16p11.2 deletion DISTAL</b>       | 6 (1.5%)            |
| <b>ADNP (Helsmoortel-van der Aa)</b> | 6 (1.5%)            |
| <b>HNRNPH2</b>                       | 5 (1.3%)            |
| <b>TRIP12</b>                        | 4 (1.0%)            |
| <b>16p11.2 duplication DISTAL</b>    | 3 (0.8%)            |
| <b>ARID1B (Coffin-Siris)</b>         | 3 (0.8%)            |
| <b>CHD2</b>                          | 3 (0.8%)            |
| <b>PPP2R1A</b>                       | 3 (0.8%)            |
| <b>17q12 duplication</b>             | 2 (0.5%)            |

|                                      |          |
|--------------------------------------|----------|
| <b>ASH1L</b>                         | 2 (0.5%) |
| <b>GRIN1</b>                         | 2 (0.5%) |
| <b>GRIN2A</b>                        | 2 (0.5%) |
| <b>KCNQ2</b>                         | 2 (0.5%) |
| <b>KDM5B</b>                         | 2 (0.5%) |
| <b>SETD5</b>                         | 2 (0.5%) |
| <b>15q11.2 BP1-BP2 deletion</b>      | 1 (0.3%) |
| <b>3q29 deletion</b>                 | 1 (0.3%) |
| <b>ANKRD11 (KBG)</b>                 | 1 (0.3%) |
| <b>AUTS2</b>                         | 1 (0.3%) |
| <b>BCL11A</b>                        | 1 (0.3%) |
| <b>CASZ1</b>                         | 1 (0.3%) |
| <b>CHD3</b>                          | 1 (0.3%) |
| <b>CHD8</b>                          | 1 (0.3%) |
| <b>CTBP1</b>                         | 1 (0.3%) |
| <b>DNMT3A (Tatton-Brown-Rahman)</b>  | 1 (0.3%) |
| <b>FOXP1</b>                         | 1 (0.3%) |
| <b>GIGYF1</b>                        | 1 (0.3%) |
| <b>HNRNPU</b>                        | 1 (0.3%) |
| <b>KMT2E (O'Donnell-Luria-Rodan)</b> | 1 (0.3%) |
| <b>MBD5</b>                          | 1 (0.3%) |
| <b>NLGN4x</b>                        | 1 (0.3%) |
| <b>NRXN1</b>                         | 1 (0.3%) |
| <b>POGZ (White-Sutton)</b>           | 1 (0.3%) |
| <b>PPP2R5C</b>                       | 1 (0.3%) |
| <b>PTCHD1</b>                        | 1 (0.3%) |
| <b>PURA</b>                          | 1 (0.3%) |
| <b>SHANK3</b>                        | 1 (0.3%) |
| <b>TAOK1</b>                         | 1 (0.3%) |
| <b>USP9X</b>                         | 1 (0.3%) |
| <b>VPS13B</b>                        | 1 (0.3%) |

**Supplemental Table 3.** During COVID-19 some dependents required access to physicians and caregivers and responded if they received telehealth services, in-person at home services, in-person at the physician office or if they could not access these medical services ( $n = 319$ ).

| Physician                   | Needed to access<br><i>n</i> (%) | Accessed through - <i>n</i> (%) |         |                  |                  |
|-----------------------------|----------------------------------|---------------------------------|---------|------------------|------------------|
|                             |                                  | Telehealth                      | At-home | In-person office | Could not access |
| <b>General practitioner</b> | 116 (29.7)                       | 67 (57.8)                       | 1 (0.9) | 42 (36.2)        | 6 (5.2)          |
| <b>Psychiatry</b>           | 28 (7.2)                         | 23 (82.1)                       | 1 (3.6) | 2 (7.1)          | 2 (7.1)          |
| <b>Neurology</b>            | 66 (16.9)                        | 52 (80)                         | 0       | 5 (7.7)          | 8 (12.3)         |
| <b>Gastroenterology</b>     | 33 (8.4)                         | 20 (60.6)                       | 0       | 2 (6.1)          | 11 (33.3)        |
| <b>Psychology</b>           | 22 (5.6)                         | 11 (50)                         | 1 (4.6) | 5 (22.7)         | 5 (22.7)         |
| <b>Other specialty</b>      | 85 (21.7)                        | 33 (38.8)                       | 3 (3.5) | 17 (20)          | 32 (37.7)        |

**Supplemental Table 4.** During COVID-19 caregivers reported if they postponed appointments or procedures for their dependents ( $n = 319$ ).

|                               | Yes<br><i>n</i> (%) | No<br><i>n</i> (%) |
|-------------------------------|---------------------|--------------------|
| <b>Appointments postponed</b> | 255 (65.22)         | 136 (34.8)         |
| <b>Procedures postponed</b>   | 134 (34.3)          | 257 (65.7)         |
